# Supplementary material for: Aging gracefully: social engagement joins exercise and enrichment as a key lifestyle factor in resistance to age-related cognitive decline
Source: PubMed Central journal article supplement — Neural Regen Res. 2019 Jan;14(1):39–42. doi: 10.4103/1673-5374.243698 (PMC6262997; doi:10.4103/1673-5374.243698), 2019-01
Supplement: NRR-14-39_Suppl1.pdf [file NRR-14-39_Suppl1.pdf]

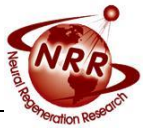

## PEER-REVIEW REPORT 1

**Name of journal:** Neural Regeneration Research

**Manuscript NO:** NRR-D-18-00483

**Title:** Aging gracefully: social engagement joins exercise and enrichment as a key lifestyle factor in resistance to age-related cognitive decline

**Reviewer's Name:** Alessandro Tonacci

**Reviewer's country:** Italy

**Date sent for review:** 2018-07-14

**Date reviewed:** 2018-07-14

**Review time:** 1 Day

### COMMENTS TO AUTHORS

Overall, the paper is quite well written and scientifically sound. However, I have just a very few comments before the paper can be publishable.

In my opinion, in some parts, references are not optimally updated. For example:

- P.2, Line 25-27: Please provide more updated references. An interesting work in this domain was published over the protocol Train The Brain by Maffei et al. (2017), and focusing on cognitive/sensory subdomains by Tonacci et al. (2017). Please, take into account those works.

In addition, some typos are present throughout the text. Please, check carefully.

After fixing those points, the paper can be published in my opinion.
